# Supplementary material for: Safety and efficacy of venetoclax-azacitidine combined with low-dose idarubicin and cytarabine regimens for the treatment of newly diagnosed acute myeloid leukemia patients compared to the standard chemotherapy: a propensity score-matched real- world single-center experience
Source: Research Square preprint supplement (doi:10.21203/rs.3.rs-6258400/v1), 2025-04-21
Supplement: Supplementary file 1 [file a72e3bd7ccb54cf83fb7a14c.docx]

Table 2. Response outcomes of the matched cohorts

| Characteristic, n(%) | Overall (n=78) | VAIA (n=26) | IA (n=52) | P-value |
| --- | --- | --- | --- | --- |
| Overall Response Rate | 63 (80.8%) | 24 (92.3%) | 39 (75.0%) | 0.067 |
| Composite CR | 56 (71.8%) | 22 (84.3%) | 34 (65.4%) | 0.075 |
| CR | 54 (69.2%) | 22 (84.3%) | 32 (61.5%) | **0.037** |
| CRi | 2 (2.6%) | 0 (0%) | 2 (3.8%) | 0.311 |
| MRD-negative CRc |  |  |  | **0.026** |
| Negative | 49 (62.8%) | 21 (80.8%) | 28 (53.8%) |  |
| Positive | 12 (15.4%) | 1(3.8%) | 11 (21.2%) |  |
| PR | 3 (3.8%) | 1 (3.8%) | 2 (3.8%) | 1.000 |
| MLFS | 4 (5.1%) | 1 (3.8%) | 3 (5.8%) | 0.717 |
| No Response | 15 (19.2%) | 2 (7.7%) | 13 (25.0%) | 0.061 |
| Early Mortality |  |  |  |  |
| 30-day mortality | 4 (5.1%) | 1 (3.8%) | 3 (5.8%) | 0.717 |
| 60-day mortality | 6 (7.7%) | 1 (3.8%) | 5 (9.6%) | 0.342 |
| Time to best response |  |  |  |  |
| Response by Day 30 | 50 (64.1%) | 20 (76.9%) | 30 (57.7%) | 0.134 |
| Response by Day 60 | 13 (16.7%) | 4 (15.4%) | 9 (17.3%) | 0.552 |
| ELN Favorable Risk | n=18 | n=6 | n=12 |  |
| Composite CR | 15 (83.3%) | 6 (100%) | 9 (75.0%) | 0.180 |
| MRD-Negative CRc | 14 (77.8%) | 6 (100%) | 8 (66.7%) | 0.109 |
| ELN Intermediate Risk | n=22 | n=7 | n=15 |  |
| Composite CR | 17 (77.3%) | 6 (85.7%) | 11 (73.3%) | 0.519 |
| MRD-Negative CRc | 15 (68.1%) | 6 (85.7%) | 9 (60.0%) | 0.228 |
| ELN Adverse Risk | n=38 | n=13 | n=25 |  |
| Composite CR | 24 (63.1%) | 10 (76.9%) | 14 (56.0%) | 0.205 |
| MRD-Negative CRc | 20 (52.6%) | 9 (69.2%) | 11 (44.0%) | 0.139 |

Abbreviations: CR=complete remission; CRh=complete response with partial haematological recovery; CRi=complete response with incomplete haematological recovery; CRc=composite of CR; PR=partial response; MLFS=morphologic leukaemia-free state; ELN=European LeukemiaNet; MRD=measurable residual disease.
