# Supplementary material for: Safety and efficacy of venetoclax-azacitidine combined with low-dose idarubicin and cytarabine regimens for the treatment of newly diagnosed acute myeloid leukemia patients compared to the standard chemotherapy: a propensity score-matched real- world single-center experience
Source: Research Square preprint supplement (doi:10.21203/rs.3.rs-6258400/v1), 2025-04-21
Supplement: Supplementary file 2 [file c5bce26a1e6395f1e72c4d4e.docx]

Table 1. Baseline characteristics of the matched cohorts

|  | Overall (n=78) | VA (n=26) | IA (n=52) | P-value |
| --- | --- | --- | --- | --- |
| Age, median(range) | 51 (26-65) | 52 (27-65) | 50 (26-63) | 0.714 |
| Gender, male, n(%) | 48 (61.5) | 15 (57.7) | 33 (63.5) | 0.631 |
| WBC, median(range) | 48.6 (0.6-314.7) | 49.3 (0.9-301.1) | 47.9 (0.6-314.7) | 0.854 |
| HGB, median(range) | 85.9 (40-153.6) | 88.6 (40-146) | 84.5 (45-153.6) | 0.970 |
| PLT, median(range) | 65.3 (8-225.7) | 68.7 (8-260) | 62.8 (12-225.7) | 0.984 |
| Bone Marrow Blast, median(range) | 54.4 (20-95.5) | 56.8(20.5-95.5) | 53.7 (20-92) | 0.896 |
| AML Type, n(%) |  |  |  | 1.000 |
| De novo | 72 (92.3) | 24 (92.3) | 48 (92.3) |  |
| sAML | 6 (7.7) | 2 (7.7) | 4 (7.7) |  |
| 2022 ELN Risk Group, n(%) |  |  |  | 0.922 |
| Favorable | 18 (23.1) | 6 (23.1) | 12 (23.1) |  |
| Intermediate | 22 (28.2) | 7 (26.9) | 15 (28.8) |  |
| Adverse | 38 (48.7) | 13 (50) | 25 (48.1) |  |
| Cytogenetics, n(%) |  |  |  | 0.961 |
| Adverse/Complex | 17 (21.8) | 6 (23.1) | 11 (21.2) |  |
| Normal | 51 (65.4) | 17 (65.4) | 34 (65.4) |  |
| Favorable | 10 (12.8) | 3 (11.5) | 7 (13.5) |  |
| Molecular mutations, n(%) |  |  |  |  |
| NPM1 Mutated | 18 (23.1) | 6 (23.1) | 12 (23.1) | 1.000 |
| IDH1 Mutated | 8 (10.3) | 3 (11.5) | 5 (9.6) | 0.792 |
| IDH2 Mutated | 6 (7.7) | 2 (7.7) | 4 (7.7) | 1.000 |
| FLT3-ITD Mutated | 15 (19.2) | 5 (19.2) | 10 (19.2) | 1.000 |
| RUNX1 Mutated | 6 (7.7) | 2 (7.7) | 4 (7.7) | 1.000 |
| ASXL1 Mutated | 9 (11.5) | 3 (11.5) | 6 (11.5) | 1.000 |
| TP53 Mutated | 12 (15.4) | 4 (15.4) | 8 (15.4) | 1.000 |
| NRAS Mutated | 8 (10.3) | 3 (11.5) | 5 (9.6) | 0.792 |
| EZH2 Mutated | 13 (16.7) | 5 (19.2) | 8 (15.4) | 0.667 |
| DNMT3A Mutated | 22 (28.2) | 7 (26.9) | 15 (28.8) | 0.859 |
| GATA2 Mutated | 7 (9.0) | 2 (7.7) | 5 (9.6) | 0.779 |

Abbreviations: WBC=white blood cell; HGB=hemoglobin; PLT=platelet; AML=acute myeloid leukemia; ELN=European LeukemiaNet.
